# Supplementary material for: 2′–5′ oligoadenylate synthetase‑like 1 (OASL1) protects against atherosclerosis by maintaining endothelial nitric oxide synthase mRNA stability
Source: PubMed Central journal article supplement (PMC9636244; doi:10.1038/s41467-022-34433-z), 2022-11-04
Supplement: 41467_2022_34433_MOESM3_ESM.pdf [file 41467_2022_34433_MOESM3_ESM.pdf]

1 **Description of Additional Supplementary Files**

2

3

4 **File name: Supplementary Data 1**

5 Description: List of antibodies used in this study.

6

7 **File name: Supplementary Data 2**

8 Description: List of qPCR primers used in this study.

9

10 **File name: Supplementary Data 3**

11 Description: List of PCR primer pairs for genotyping used in this study.
